# Supplementary material for: Seaweed Extract-Stimulated Priming in Arabidopsis thaliana and Solanum lycopersicum
Source: MDPI journal article supplement (doi:10.3390/plants10112476), 2021-11-16
Supplement: s1 [file s1]

Supplementary Figure S1: Experimental outline of investigation of responses at priming phase in *Arabidopsis thaliana* and *Solanum lycopersicum* following a single SWE application.

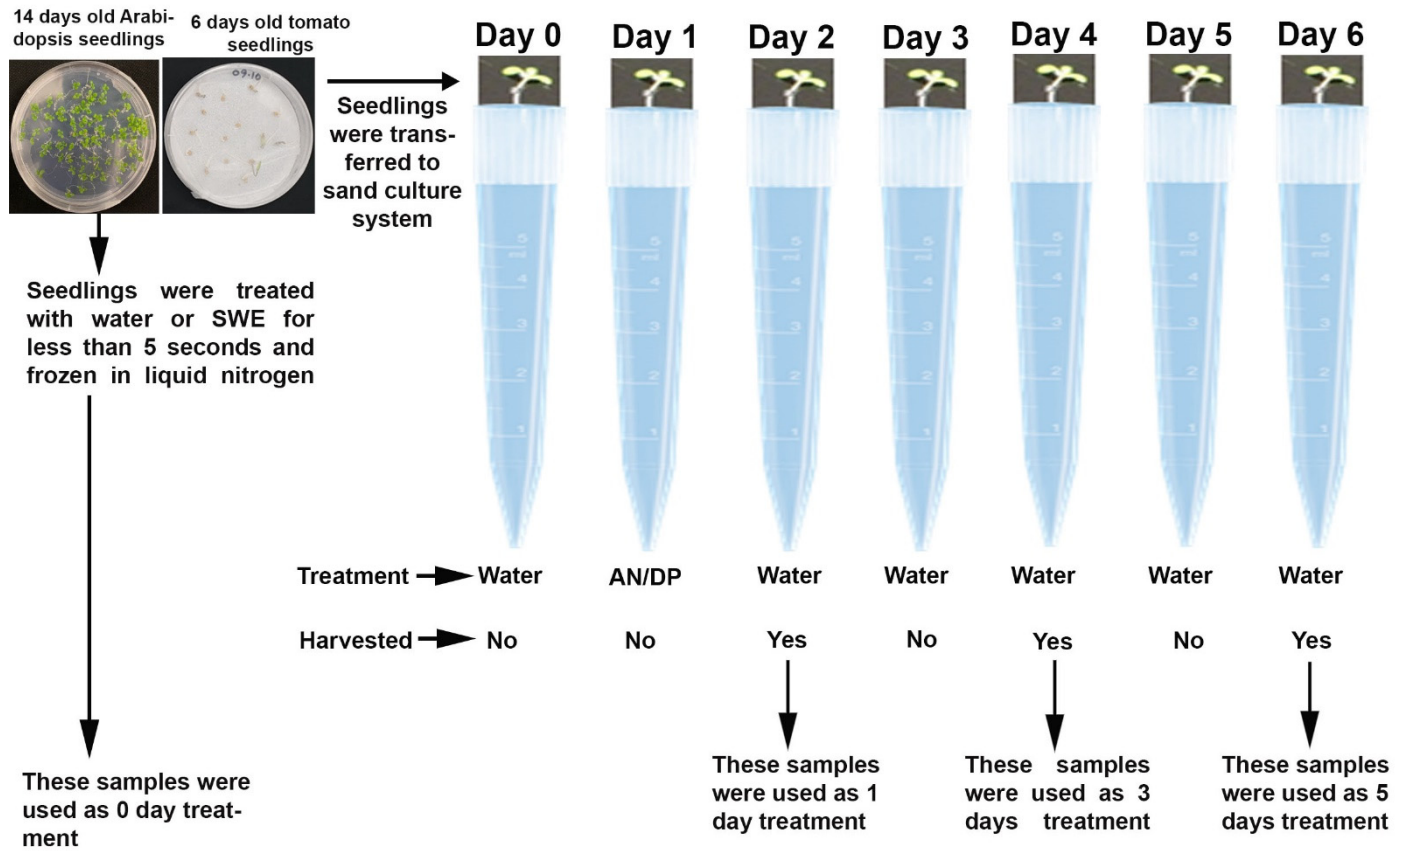

Supplementary Table S1. Primer pair sequences used in this study

| Arabidopsis thaliana |                          |                     |               |
|----------------------|--------------------------|---------------------|---------------|
| Gene id (s)          | Sequence                 | Product length (bp) | Primer source |
| ACT2 for             | ACCTTGCTGGACGTGACCTT     | 88                  | This study    |
| ACT2 rev             | ATTTCCTGCTCTGCTGTTGT     |                     |               |
| ACT8 for             | AACCAGCTCCTCCATCGAAA     | 130                 |               |
| ACT8 rev             | GATCCCTGCAGCTTCCATTC     |                     |               |
| MYB75 for            | TTCCTGCACCGGTTTAGCCC     | 122                 |               |
| MYB75 rev            | TTGGTGTGCATAGATTCTTCCTGA |                     |               |
| PR1 for              | CGTAAGGCCACCAGAGTGT      | 131                 |               |
| PR1 rev              | TCACAACCAGGCACGAGGAG     |                     |               |
| NPR1 for             | TACCAGTGAGACGGTCAGGC     | 136                 |               |
| NPR1 rev             | TGTGTCGTCCACTGTTTAGTTGC  |                     |               |
| PR5 for              | AGCGGCATTGCTGTTATGGC     | 134                 |               |
| PR5 rev              | CGGGAAGCACCTGGAGTCAA     |                     |               |

|                                    |                             |     |            |
|------------------------------------|-----------------------------|-----|------------|
| <i>PCC1</i> for                    | GTACACAAGTCCGCCACCAA        | 93  |            |
| <i>PCC1</i> rev                    | ACGCCCTTGGAGTTTGTCTC        |     |            |
| <i>ACD6</i> for                    | CTTCTCGTGGTAGCGGCTCT        | 122 |            |
| <i>ACD6</i> rev                    | GGGTAGTGGCCAAAGTTGC         |     |            |
| <i>AED1</i> for                    | ATTATGCTTTGCGTATGTCTCAATTGG | 261 | [22]       |
| <i>AED1</i> rev                    | GGACTCCACACGTGCTTGATCG      |     |            |
| <i>GRXC9</i> for                   | TCTCAAGGACCGCCGGATTC        | 129 | This study |
| <i>GRXC9</i> rev                   | ACGGCGAGAGAGTTTCGGATG       |     |            |
| <i>EDS16</i> for                   | TTGGCAGGGAGACTTACGAAGG      | 91  |            |
| <i>EDS16</i> rev                   | AATTCGAAGAAATGAAGAGCTTGGA   |     |            |
| <i>RBOHD</i> for                   | AAGCGGGATAGTCGTCGGTG        | 77  |            |
| <i>RBOHD</i> rev                   | CCGCGGCAATTAACGTGGA         |     |            |
| <i>GSTF8</i> for                   | GCAGGAGTGCGACAGAAACC        | 145 |            |
| <i>GSTF8</i> rev                   | ACCGACAACATGAACAGTGGC       |     |            |
| <i>SAG21</i> for                   | AGCGGTGGAAGAAGTGGAGC        | 140 |            |
| <i>SAG21</i> rev                   | GCGTCAATCTCGTTGGAACCG       |     |            |
| <i>TPX2</i> for                    | TGGGTCTGGAGAATACACGC        | 138 |            |
| <i>TPX2</i> rev                    | TCGCCACCAGATTCAACATTGG      |     |            |
| <b><i>Solanum lycopersicum</i></b> |                             |     |            |
| <i>SINPR1</i> for                  | TGTGGGAAAGATAGCAGCACG       | 140 | [31]       |
| <i>SINPR1</i> rev                  | GTCCACACAAACACACACATC       |     |            |
| <i>SIEF1α</i> for                  | GATTGGTGGTATTGGAAGTGC       | 137 | [59]       |
| <i>SIEF1α</i> rev                  | AGCTTCGTGGTGCATCTC          |     |            |
| <i>SLActin7</i> for                | GATACCTGCAGCTTCCATACC       | 110 | [60]       |
| <i>SLActin7</i> rev                | GCTTTGCCGCATGCCATTCT        |     |            |
| <i>SIPR5</i> for                   | TGGGCCGGGAAAATGTCATCC       | 150 | This study |
| <i>SIPR5</i> rev                   | GTAGGACCACATGGACCTTGAGTG    |     |            |

Table S2. Experimental outline of investigation of responses at post-challenge primed state in *Arabidopsis thaliana* following 2 SWE applications and inoculated with *Phytophthora cinnamomi* (*Pc*).

| Treatment                 | Day 0                  | Day 1                   | Day 2             | Day 3                   | Day 4             | Day 5                   | Day 6                   | Day 7                                                                     | Day 8                   | Day 9                                                                     |
|---------------------------|------------------------|-------------------------|-------------------|-------------------------|-------------------|-------------------------|-------------------------|---------------------------------------------------------------------------|-------------------------|---------------------------------------------------------------------------|
| dH <sub>2</sub> O Control | 2 mL                   | 700 µL                  | 700 µL            | 700 µL                  | 700 µL            | 700 µL                  | 700 µL                  | <b>‘3 days post-priming’</b><br>Inoculation with <i>Pc</i> and harvesting | 700 µL                  | <b>‘5 days post-priming’</b><br>Inoculation with <i>Pc</i> and harvesting |
| Diluted SWE               | dH <sub>2</sub> O 2 mL | dH <sub>2</sub> O 700µL | <b>SWE 700 µL</b> | dH <sub>2</sub> O 700µL | <b>SWE 700 µL</b> | dH <sub>2</sub> O 700µL | dH <sub>2</sub> O 700µL | <b>‘3 days post-priming’</b><br>Inoculation with <i>Pc</i> and harvesting | dH <sub>2</sub> O 700µL | <b>‘5 days post-priming’</b><br>Inoculation with <i>Pc</i> and harvesting |

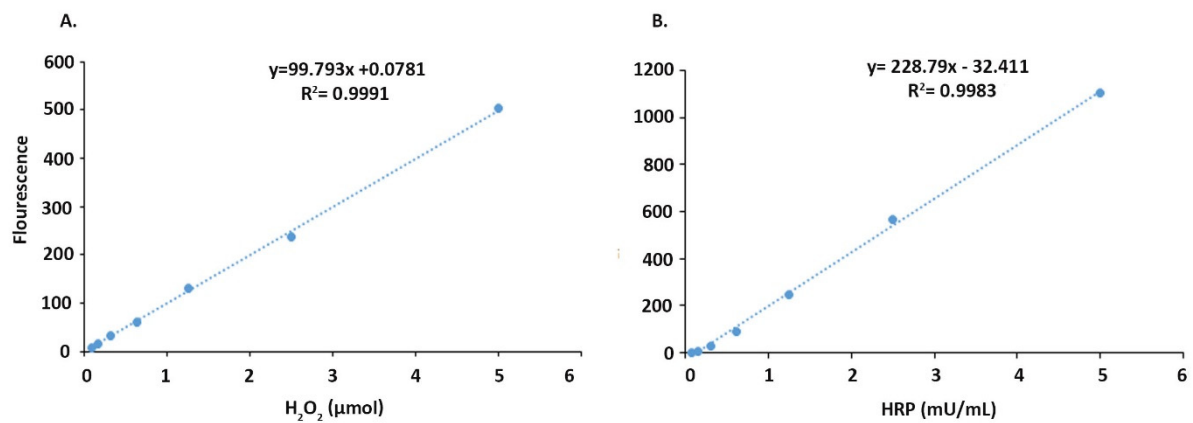

Supplementary Figure S2. Linear regression of various concentrations of H<sub>2</sub>O<sub>2</sub> and horseradish peroxidase (HRP). To detect H<sub>2</sub>O<sub>2</sub> and HRP, the indicated amount of H<sub>2</sub>O<sub>2</sub> (A) and HRP (B) were added in reactions containing 50 μmol Amplex Red reagent and 50 mM sodium phosphate buffer, pH 7.4. Then the reactions was incubated for 30 minutes at room temperature in the dark. Fluorescent was then measured with a fluorescent microplate reader using excitation at 530 nm and fluorescent emission at 590.

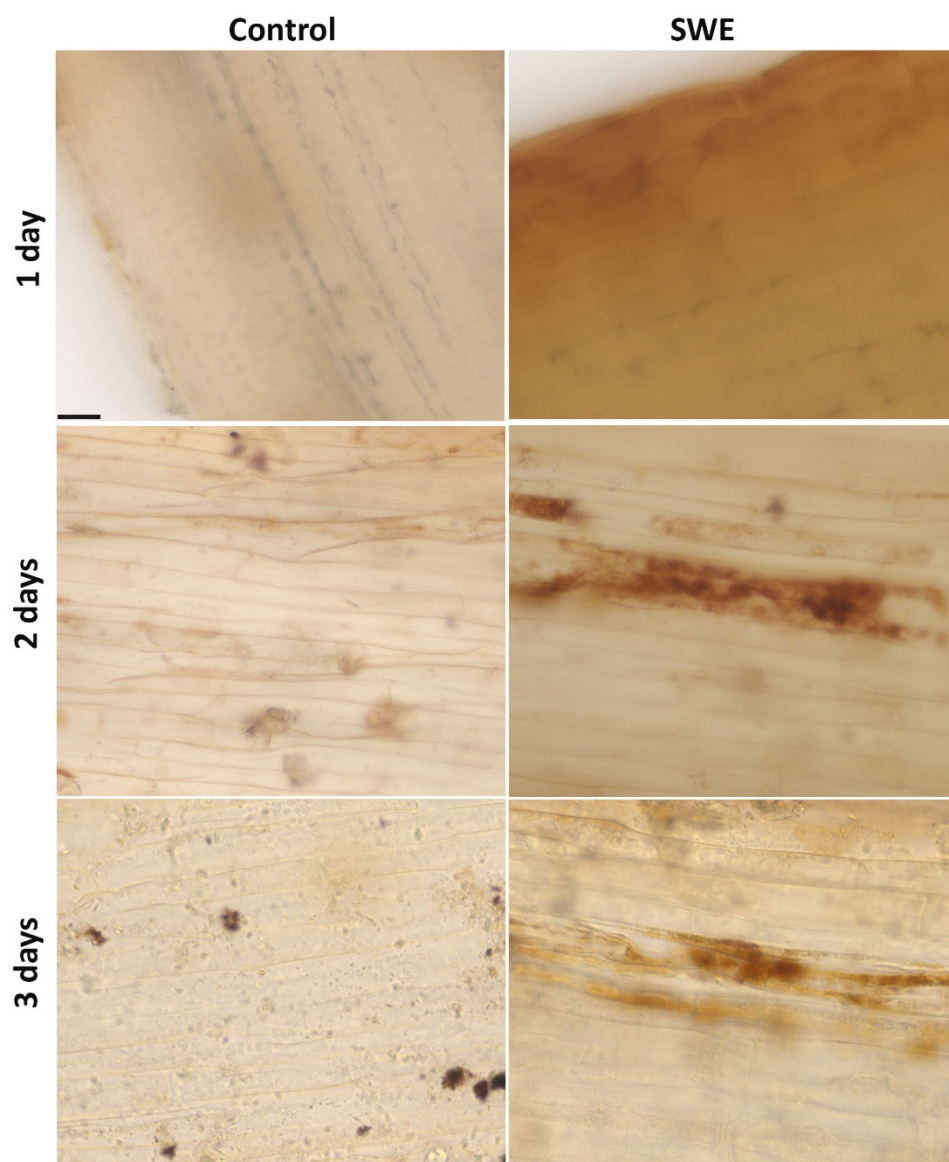

**Supplementary Figure S3.** Hydrogen peroxide (H<sub>2</sub>O<sub>2</sub>) detection in tomato roots grown in the sand culture system with application of SWE (1:400 dilution) or water as the control. Images were collected at 1, 2 and 3 days after SWE treatment. Scale bar = 20  $\mu$ m. Images are representative of three independent biological replicates each with at least 12 roots.

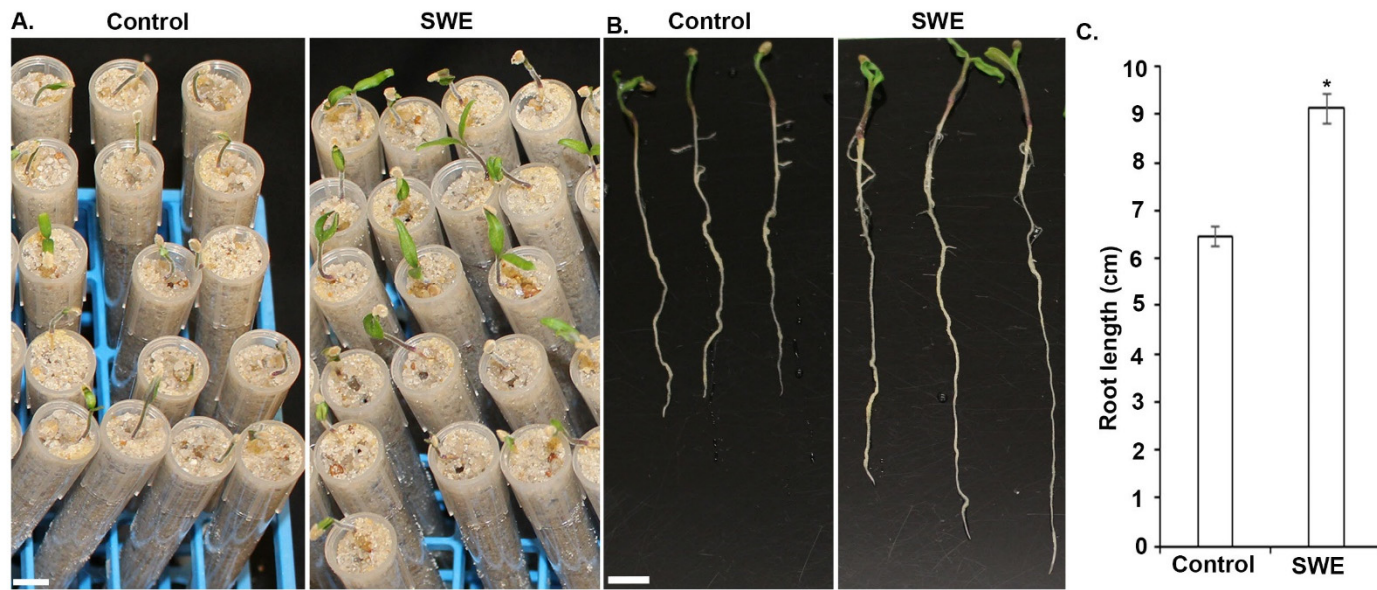

Supplementary Figure S4. The effect of seaweed extract (SWE) application on plant vigor and root growth. A. Tomato seedlings growing in sand at five days after SWE treatment or water as a control. B. Tomato plants after harvesting from sand at five days after SWE treatment or water as a control Scale bar = 1 cm C. Root length (determined using ImageJ software) for tomato seedlings at five days after treatment with SWE or water control. \* denotes significant difference ( $p < 0.05$ ) between treated and control plants. Data shown are the mean of three independent biological replicates (each replicate consisted of 10 plants) and bars represent the standard error of the mean
